# Supplementary material for: High-throughput evaluation of epilepsy-associated KCNQ2 variants reveals functional and pharmacological heterogeneity
Source: PubMed Central journal article supplement (PMC8983144; doi:10.1172/jci.insight.156314), 2022-03-08
Supplement: jciinsight-7-156314-s075.pdf [file jciinsight-7-156314-s075.pdf]

# High-throughput Evaluation of Epilepsy-associated *KCNQ2* Variants Reveals Functional and Pharmacological Heterogeneity

Carlos G. Vanoye, Reshma R. Desai, Zhigang Ji, Sneha Adusumilli, Nirvani Jairam, Nora Ghabra, Nishtha Joshi, Eryn Fitch, Katherine Helbig, Dianalee McKnight, Amanda Lindy, Fanggeng Zou, Ingo Helbig, Edward C. Cooper, and Alfred L. George, Jr.

## SUPPLEMENTARY MATERIAL

### *Supplemental Figures*

- Fig. S1 *KCNQ2* variants analyzed in this study
- Fig. S2 Comparison of automated and manual patch clamp recording of *KCNQ2/KCNQ3*
- Fig. S3 Whole-cell currents from literature *KCNQ2* variants (homozygous state)
- Fig. S4 Whole-cell currents from literature *KCNQ2* variants (heterozygous state)
- Fig. S5 Manual and automated patch clamp analyses of *KCNQ2* variants (heterozygous state)
- Fig. S6 Whole-cell currents of *KCNQ2* population variants (homozygous state)
- Fig. S7 Whole-cell currents of *KCNQ2* population variants (heterozygous state)
- Fig. S8 Whole-cell currents of *KCNQ2* epilepsy variants (homozygous state)
- Fig. S9 Whole-cell currents of *KCNQ2* epilepsy variants (heterozygous state)
- Fig. S10 Retigabine effects on *KCNQ2* variants expressed in the homozygous state
- Fig. S11 Retigabine effects on *KCNQ2* variants expressed in the heterozygous state

### *Supplemental Tables*

- Table S1 *KCNQ2* variant information
- Table S2 Sequence of mutagenic primers used to generate *KCNQ2* variants
- Table S3 Data from manual and automated patch clamp recording of *KCNQ2* in CHO-Q3 cells
- Table S4 Functional properties of homozygous *KCNQ2* variants under control conditions
- Table S5 Functional properties of heterozygous *KCNQ2* variants under control conditions
- Table S6 Functional properties of homozygous *KCNQ2* variants after exposure to retigabine
- Table S7 Functional properties of heterozygous *KCNQ2* variants after exposure to retigabine

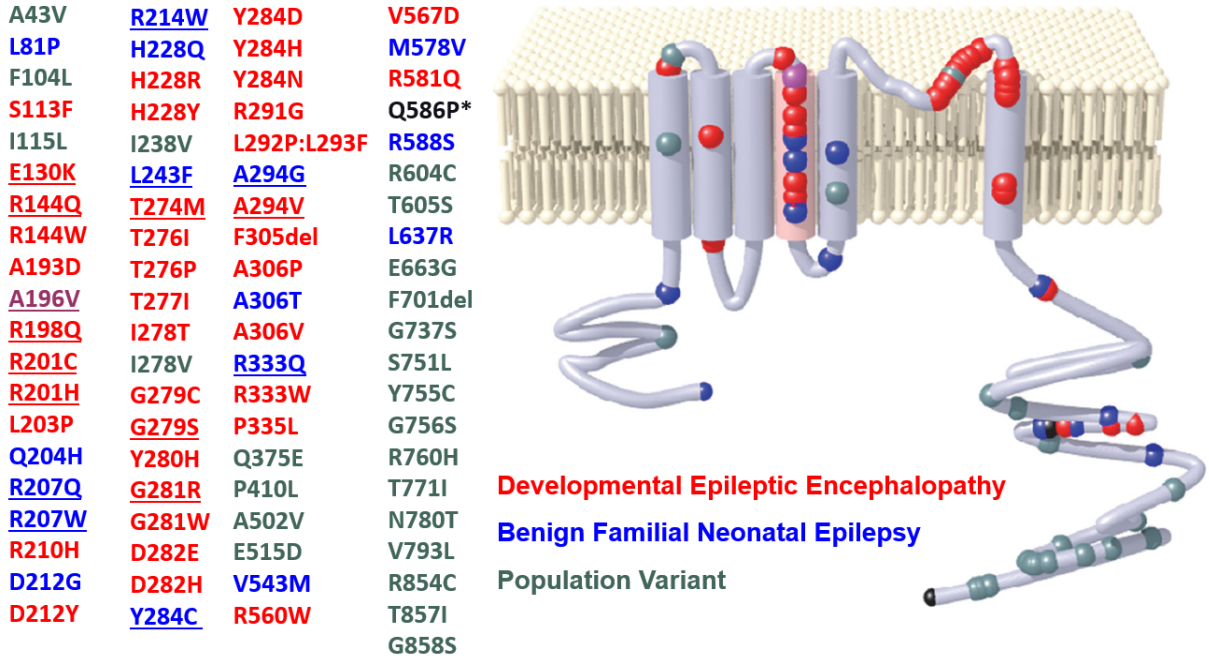

**Figure S1. KCNQ2 variants analyzed in this study.** Location and classification of the 81 KCNQ2 variants analyzed in this study. BFNE-associated variants are shown as blue dots, DEE-associated variants as red dots, the purple dot represents a variant associated with both BFNE and DEE, and population variants are denoted as green dots. Variant Q586P (marked by \*) is associated with unknown phenotype category. Literature variants are underlined.

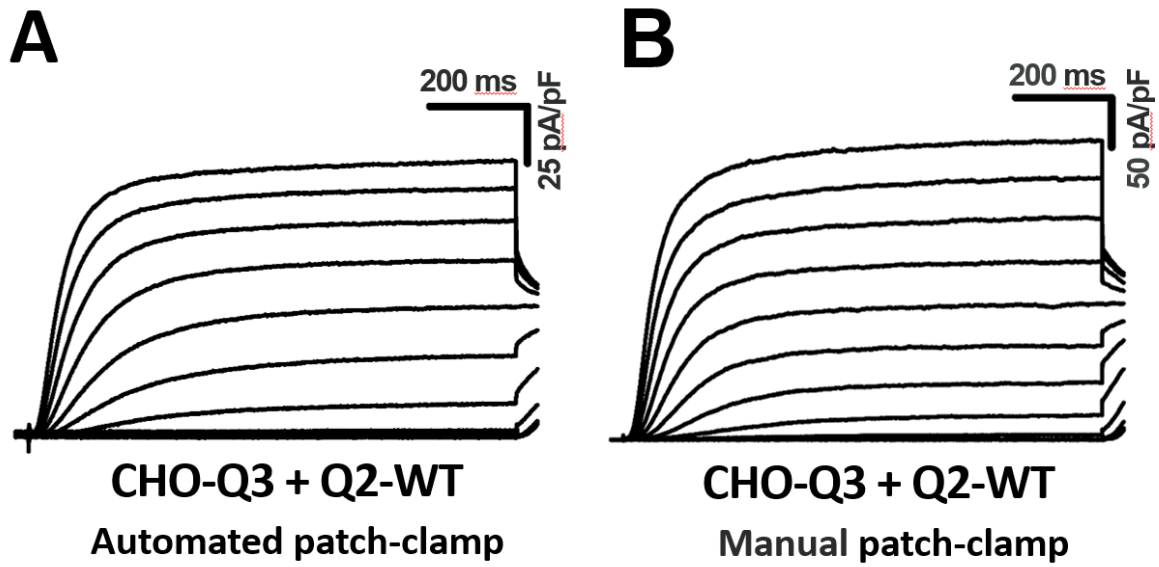

**Figure S2. Comparison of automated and manual patch clamp recording of KCNQ2/KCNQ3.** Whole cell current density recorded from CHO-Q3 cells electroporated with wild type KCNQ2 (Q2-WT) using either automated (**A**) or manual (**B**) patch clamp.

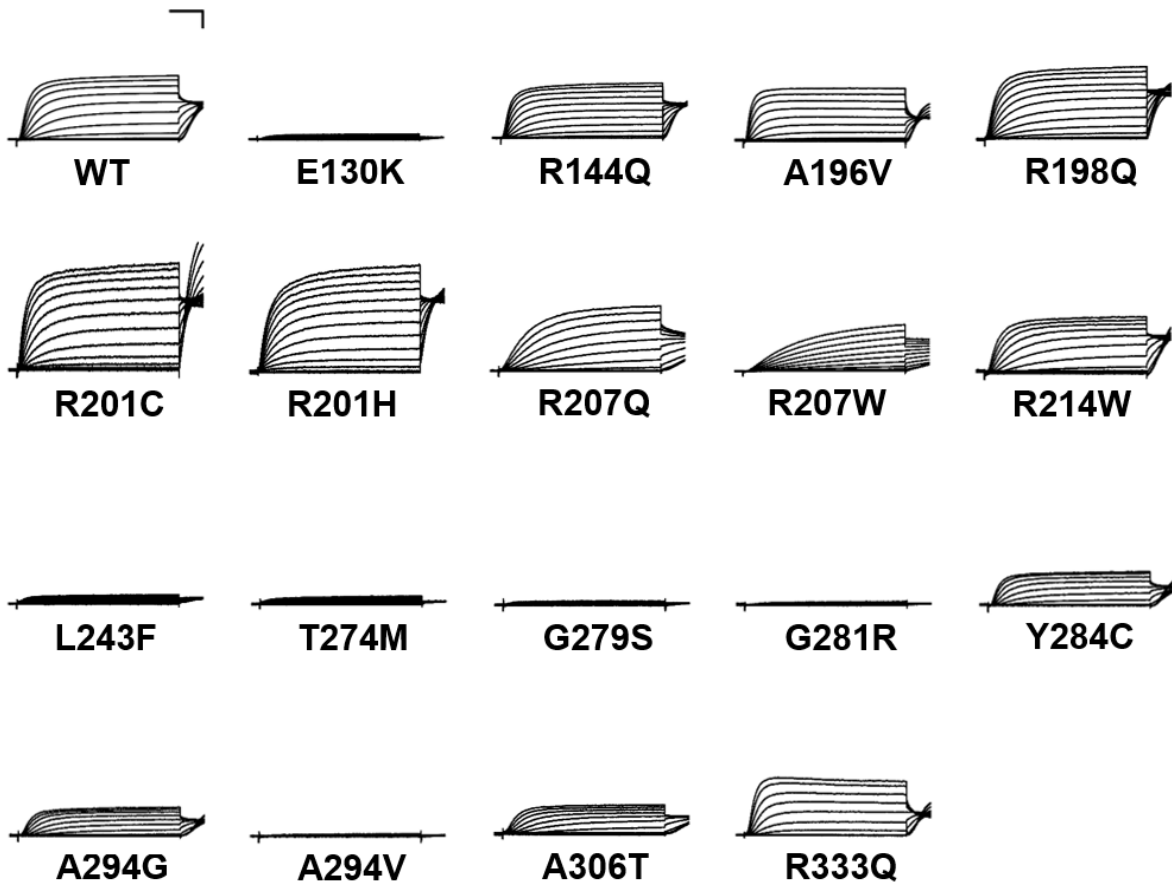

**Figure S3. Whole-cell currents from literature KCNQ2 variants expressed as homozygous channels.** Average XE-991-sensitive whole-cell currents recorded by automated patch clamp from CHO-Q3 cells electroporated with KCNQ2 variants from the literature set and normalized to wild type channel peak current recorded in parallel. For variant R201C, whole-cell currents were recorded from CHO-K1 cells co-electroporated with KCNQ3-WT plus KCNQ2-variant. Scale bars are 200 ms (horizontal) and 25% of WT channel current density (vertical).

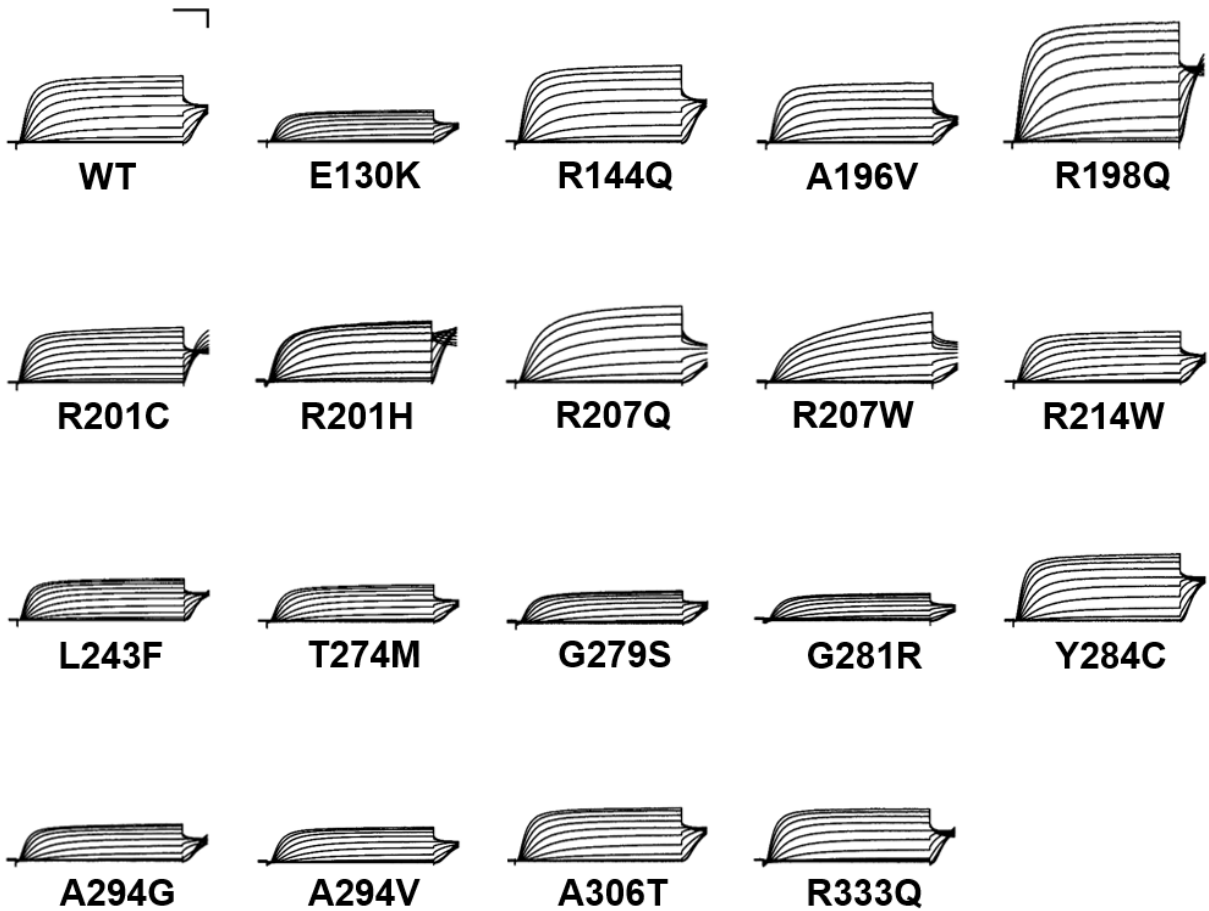

**Figure S4. Whole-cell currents from literature KCNQ2 variants expressed as heterozygous channels.** Average XE-991-sensitive whole-cell currents recorded by automated patch clamp from CHO-Q3 cells co-electroporated with wild type plus variant KCNQ2 cDNA from the literature set and normalized to wild type channel peak current recorded in parallel. Scale bars are 200 ms (horizontal) and 25% of WT channel current density (vertical).

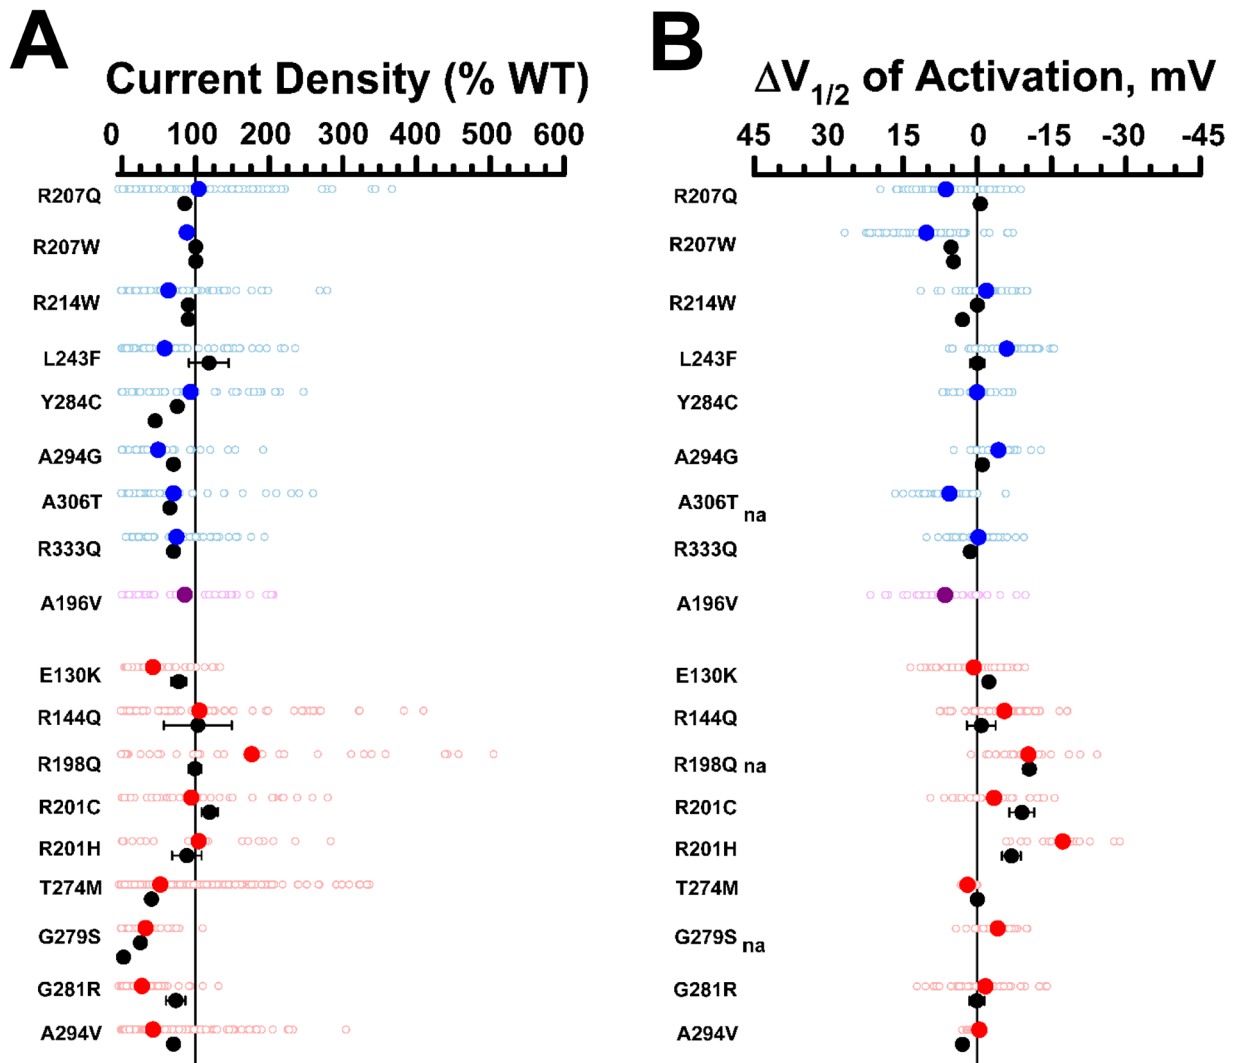

**Figure S5. Manual and automated voltage clamp analyses of KCNQ2 variants expressed in the heterozygous state yield similar biophysical properties.** **A.** Average whole-cell currents recorded at +40 mV from CHO-Q3 cells co-expressing variant + wild type KCNQ2 and normalized to WT channel peak current that was measured in parallel. **B.** Change ( $\Delta$ ) in voltage-dependence of activation  $V_{1/2}$  determined for heterozygous KCNQ2 variants relative to the WT channel  $\Delta V_{1/2}$  measured in parallel. Black symbols represent mean  $\pm$  SEM voltage-clamp data from literature reported variants (error bars are smaller than data symbol in some cases), while automated patch clamp results are shown as blue for BFNE, red for DEE, or purple symbols for BFNE/DEE pathogenic variants. All experimental data are presented as open circles with filled circles representing mean values. na = not available in the literature.

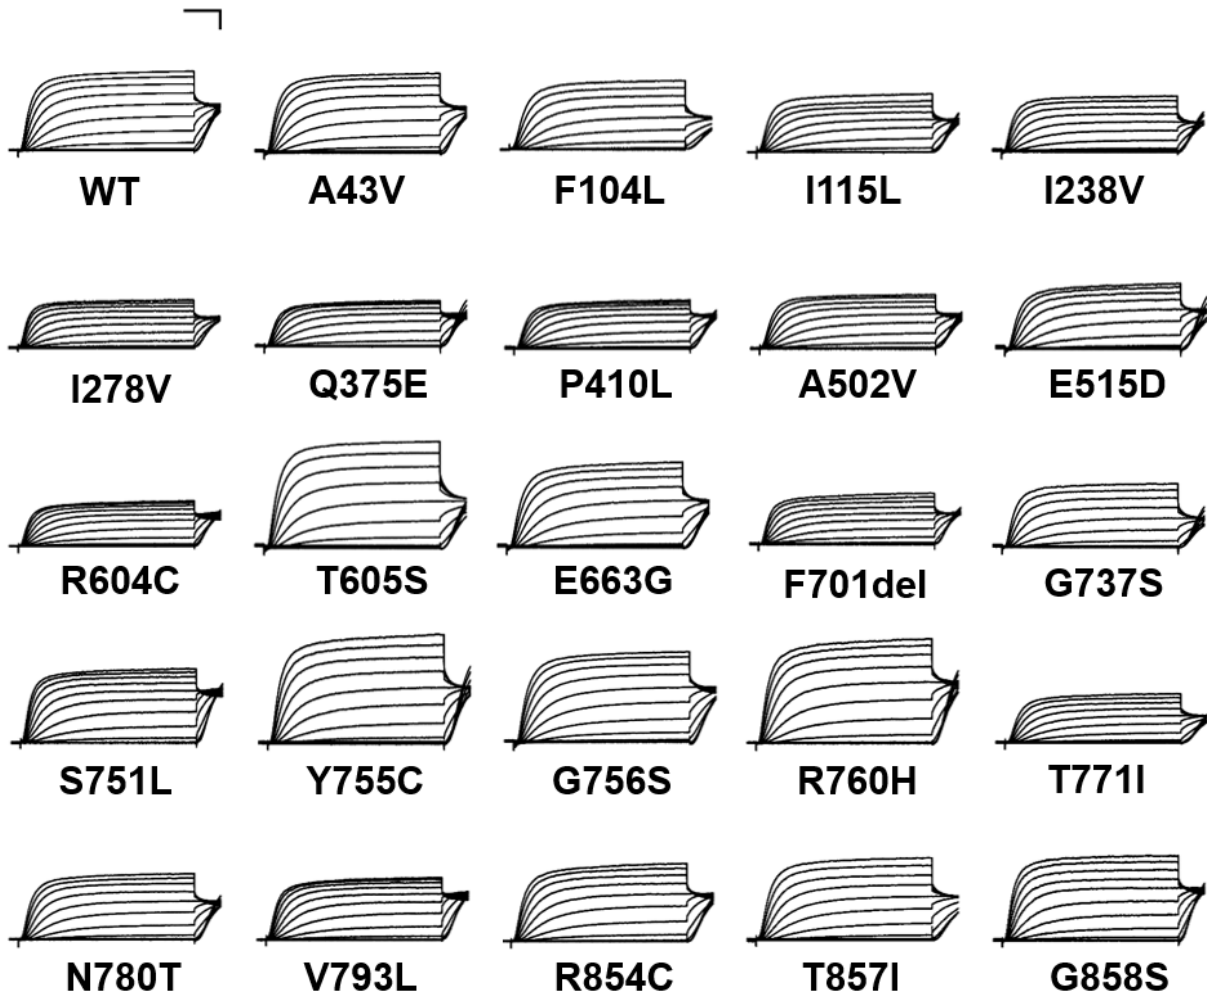

**Figure S6. Average whole-cell currents recorded from CHO-Q3 cells electroporated with population KCNQ2 variants.** Average XE-991-sensitive whole-cell currents recorded by automated patch clamp from CHO-Q3 cells electroporated with rare population KCNQ2 variants and normalized to wild type channel peak current measured in parallel. Scale bars are 200 ms (horizontal) and 25% of WT channel current density (vertical).

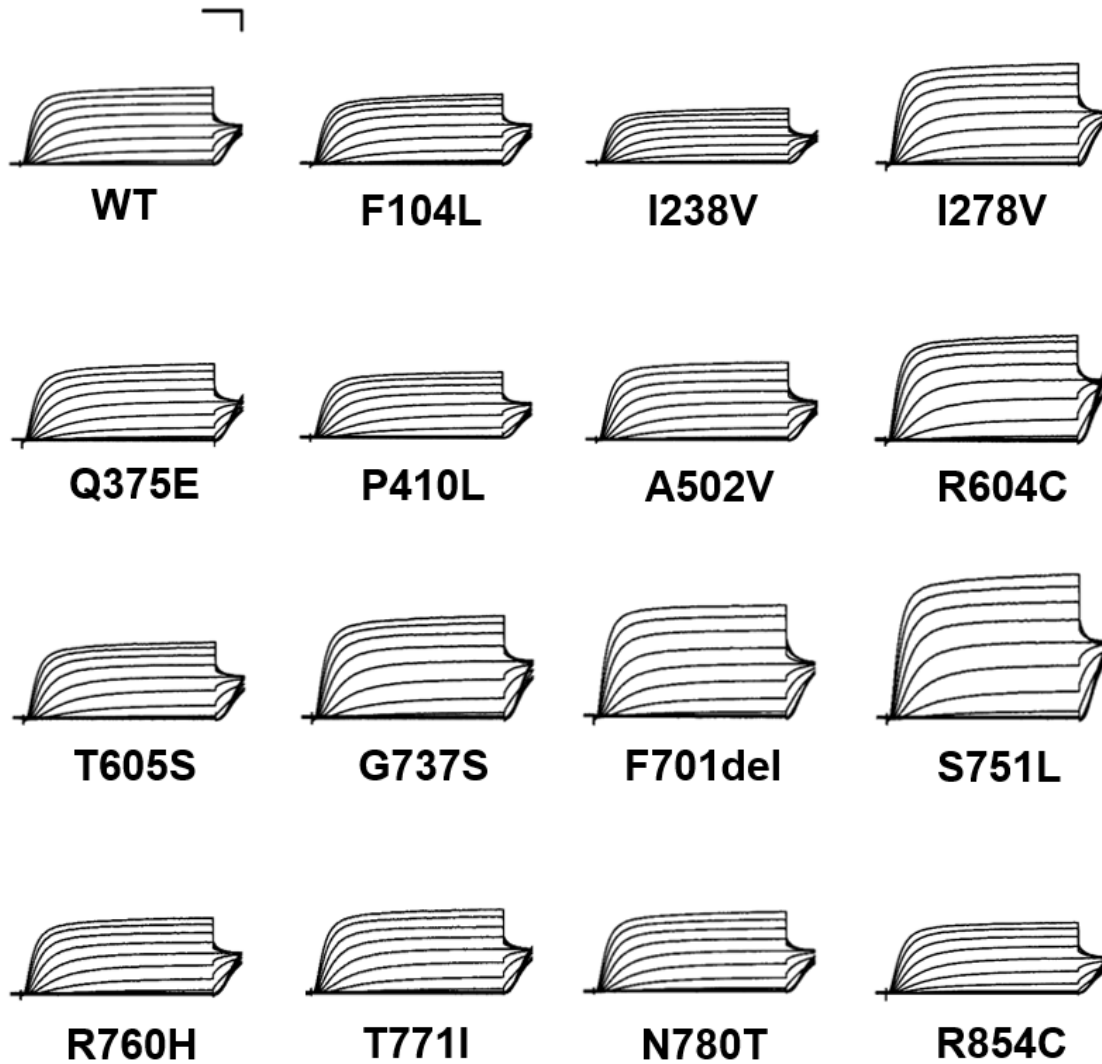

**Figure S7. Average whole-cell currents recorded from CHO-Q3 cells co-electroporated with selected population variants plus wild type KCNQ2.** Average XE-991-sensitive whole-cell currents recorded by automated patch clamp from CHO-Q3 cells co-electroporated with rare population variants plus wild type KCNQ2 and normalized to wild type channel peak current recorded in parallel. Scale bars are 200 ms (horizontal) and 25% of WT channel current density (vertical).



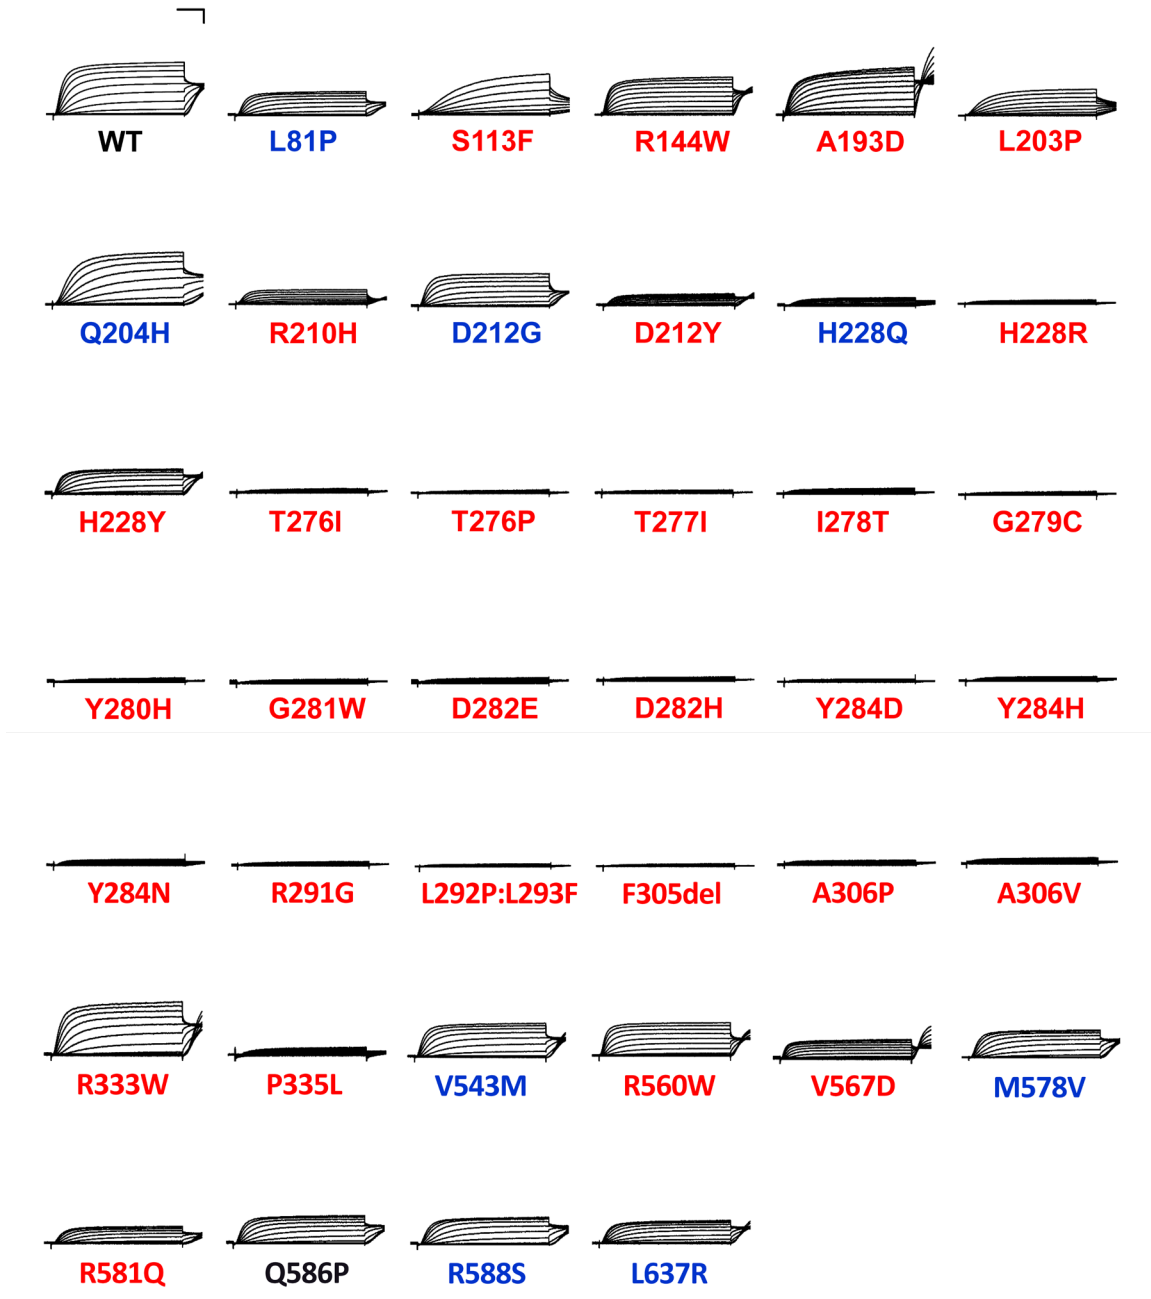

**Figure S8. Whole-cell currents from epilepsy-associated KCNQ2 variants expressed as homozygous channels.** Average XE-991-sensitive whole-cell currents recorded by automated patch clamp from CHO-Q3 cells electroporated with epilepsy-associated KCNQ2 variants and normalized to wild type channel peak current recorded in parallel. Variant labels: **Blue** = BFNE-associated; **Red** = DEE-associated; **Black** = unknown phenotype category (Q586P). For A193D and P335L, whole-cell currents were recorded from CHO-K1 cells co-electroporated with KCNQ3-WT plus KCNQ2-variant. Scale bars are 200 ms (horizontal) and 25% of WT channel current density (vertical).

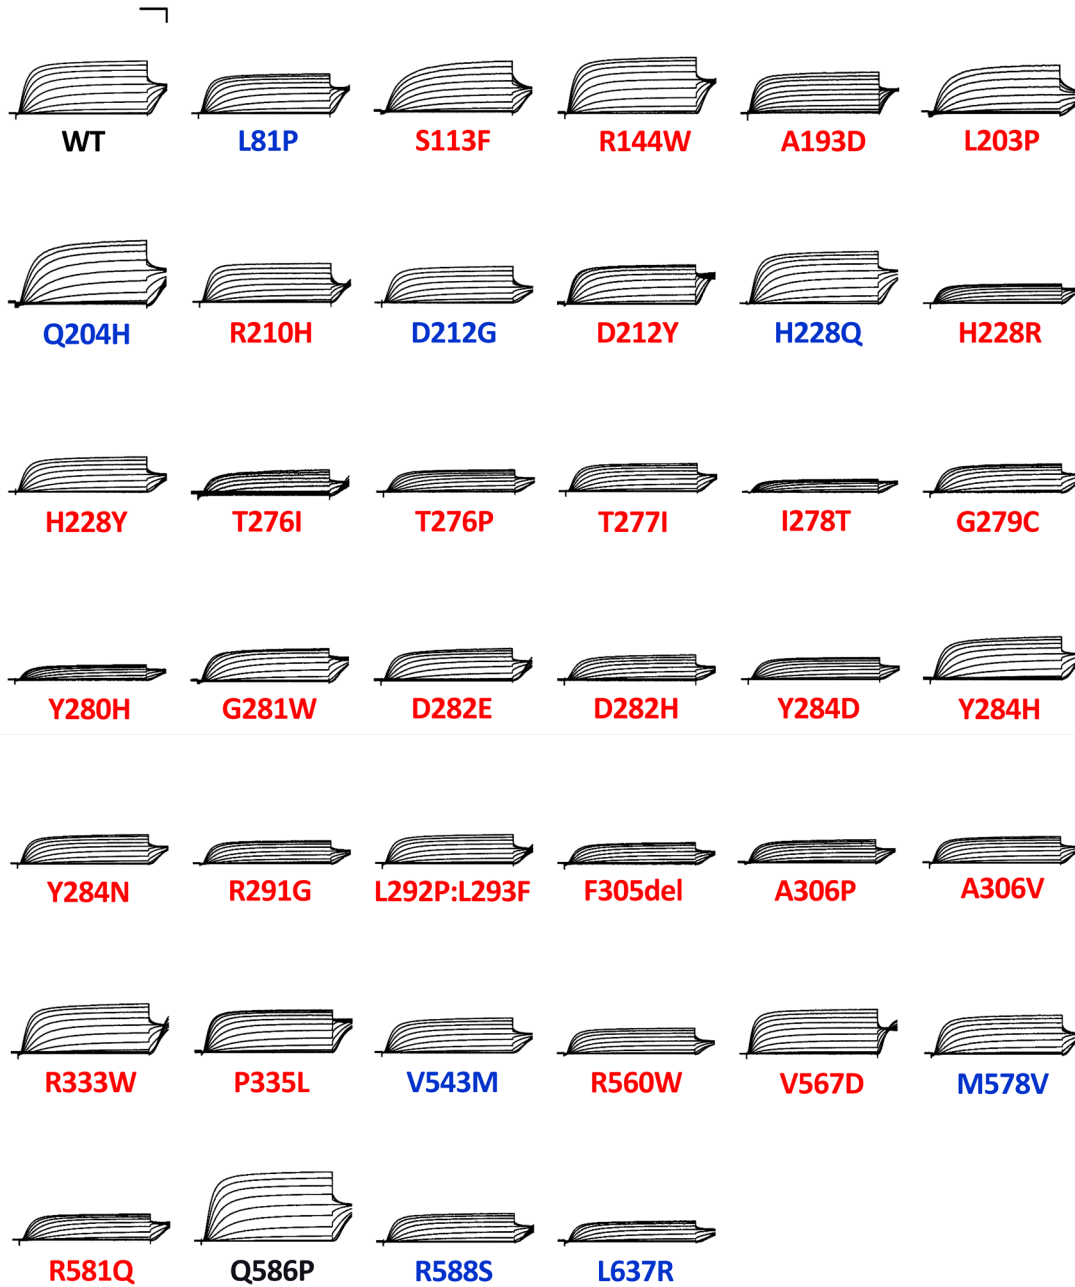

**Figure S9. Average whole-cell currents recorded from CHO-Q3 cells co-electroporated with epilepsy-associated variants plus wild type KCNQ2.** Average XE-991-sensitive whole-cell currents recorded by automated patch clamp from CHO-Q3 cells co-electroporated with epilepsy-associated KCNQ2 variants plus WT KCNQ2 and normalized to wild type channel peak current recorded in parallel. Variant labels: **Blue** = BFNE-associated; **Red** = DEE-associated; **Black** = unknown phenotype category (Q586P). Scale bars are 200 ms (horizontal) and 25% of WT channel current density (vertical).

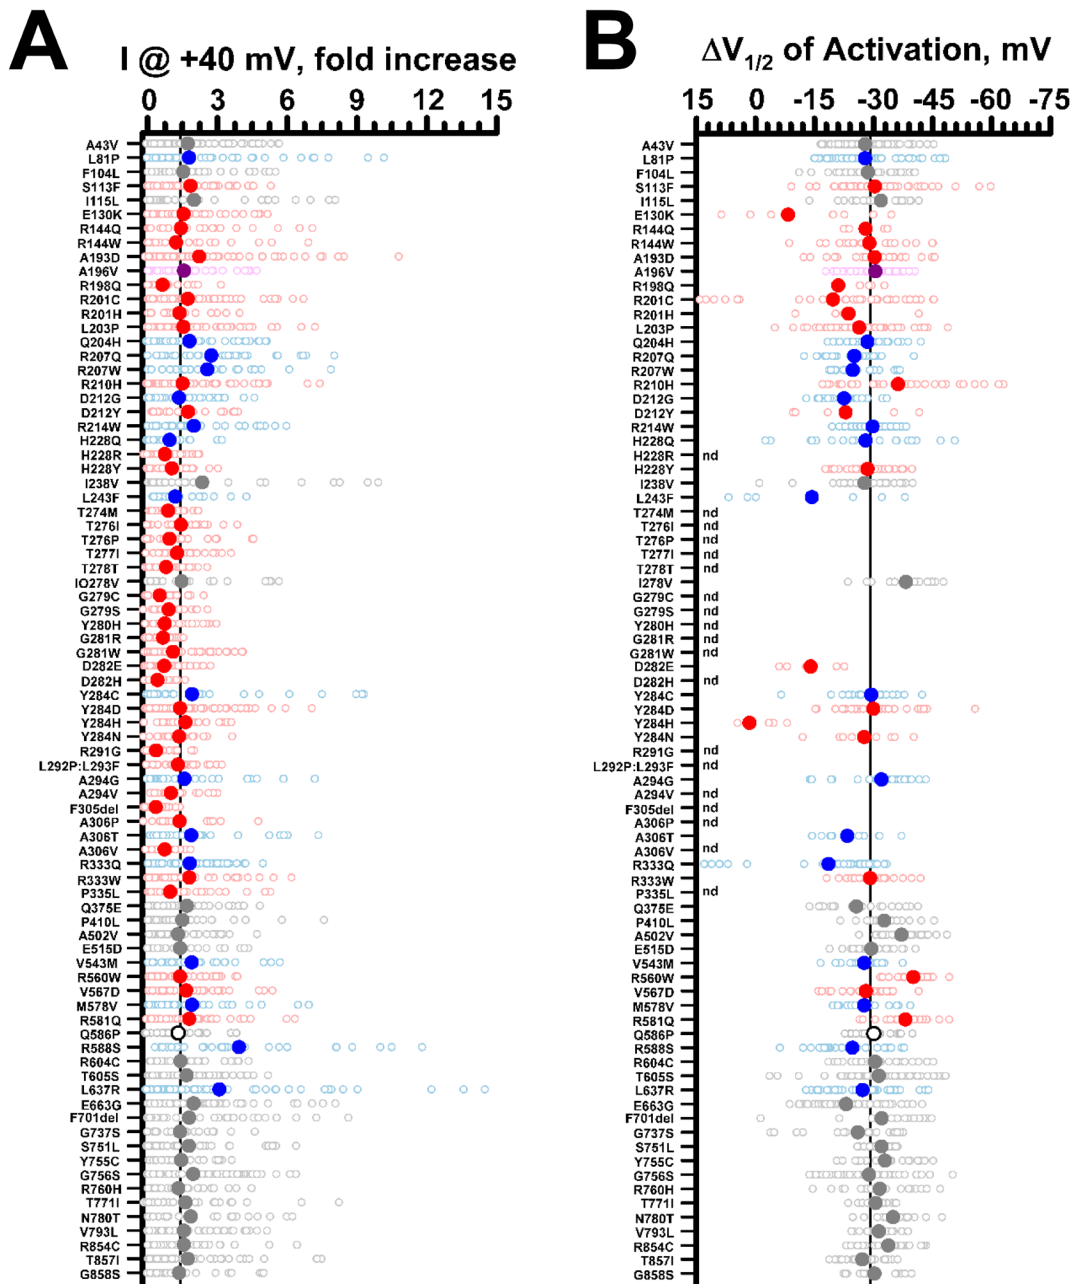

**Figure S10. Retigabine effects on whole-cell currents recorded from KCNQ2 variants expressed in the homozygous state. A)** Ratio of whole-cell currents recorded at +40 mV after exposure to 10  $\mu$ M retigabine and divided by the current measured under control conditions (n = 15-86). **B)** Change in voltage-dependence of activation  $V_{1/2}$  determined for whole-cell currents after exposure to 10  $\mu$ M retigabine (n = 5-74). Dashed lines indicate average effect of retigabine on current amplitude and change in voltage-dependence of activation  $V_{1/2}$  in the wild type channel. All experimental data are presented as open circles with larger filled circles representing mean values for BFNE (blue), DEE (red), BFNE/DEE (purple), unclear phenotype (white) or population (grey) variants. For complete list of results, see **Supplemental Table 6**.

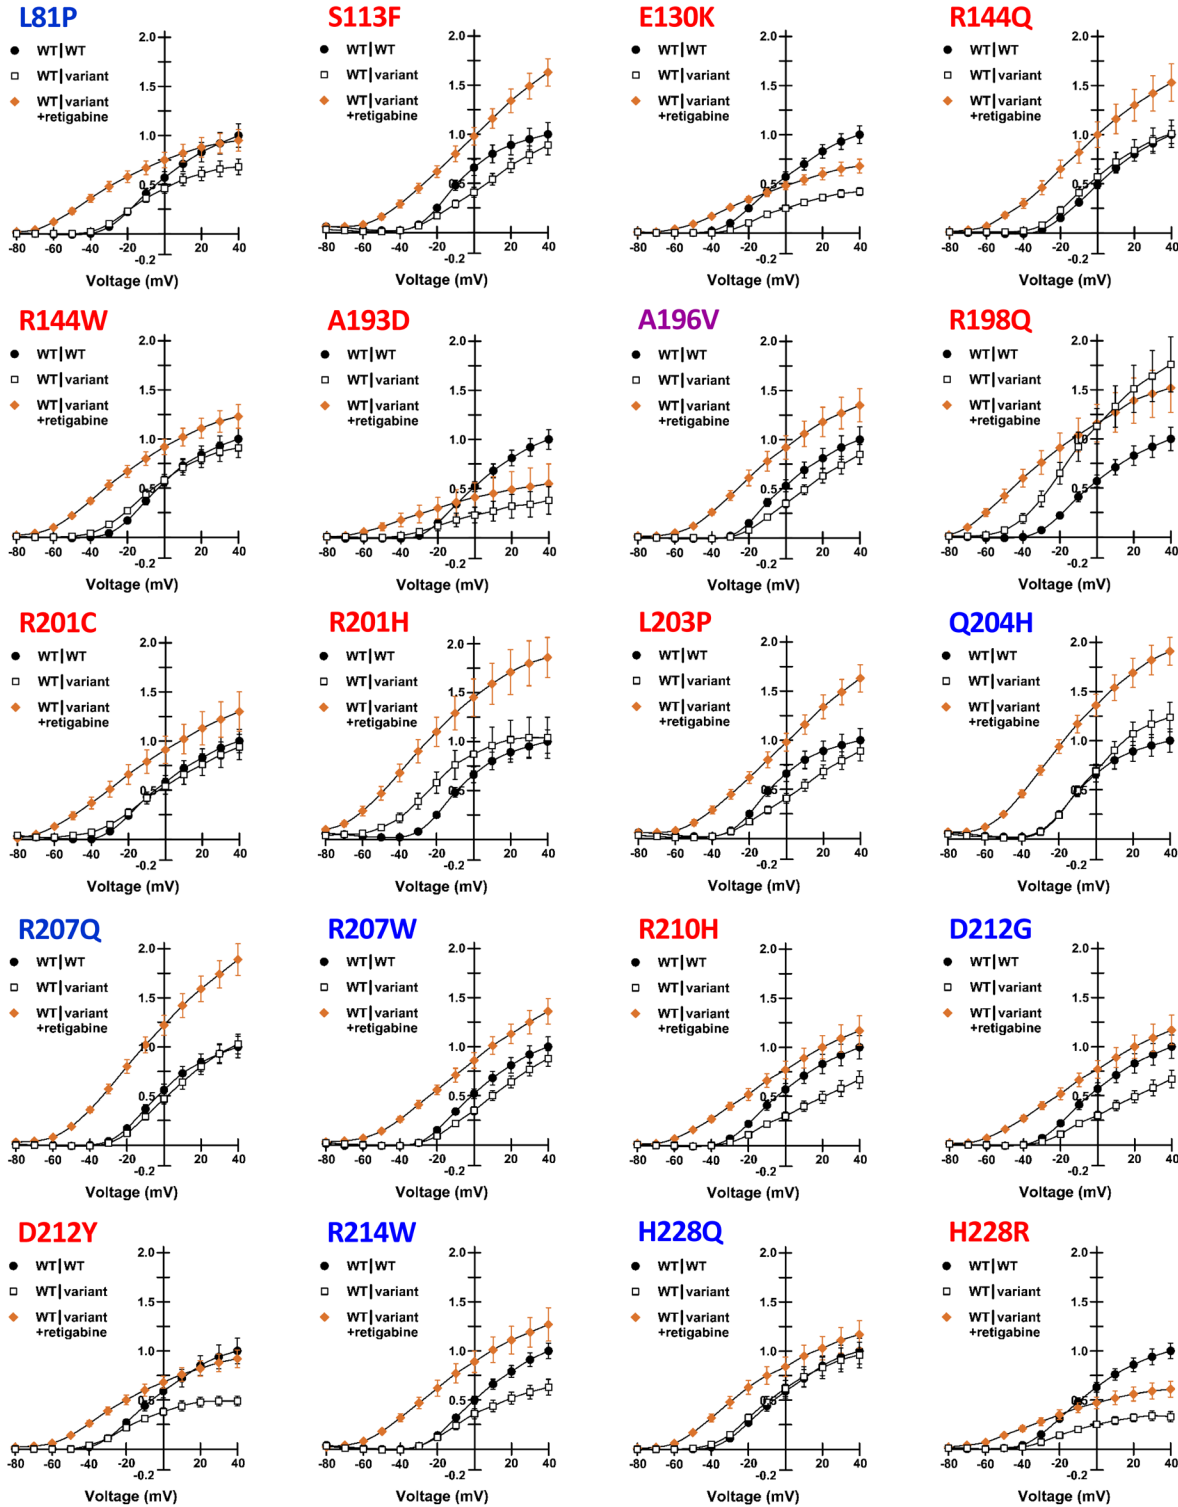

**Figure S11. Retigabine effects on whole-cell currents recorded from epilepsy-associated KCNQ2 variants expressed in the heterozygous state.** Normalized current-voltage relationships for each variant expressed in the heterozygous state recorded in the absence of retigabine (WT|variant, open squares) compared with heterozygous variants recorded in the absence of retigabine (WT|variant +retigabine, orange filled diamonds). Currents were first normalized to cell capacitance, then re-normalized to the peak current for WT channels recorded in parallel (WT|WT, filled circles). Variant labels: **Blue** = BFNE-associated; **Red** = DEE-associated; **Purple** = BFNE/DEE; **Black** = unknown phenotype category. Complete data sets are presented in **Table S7**.

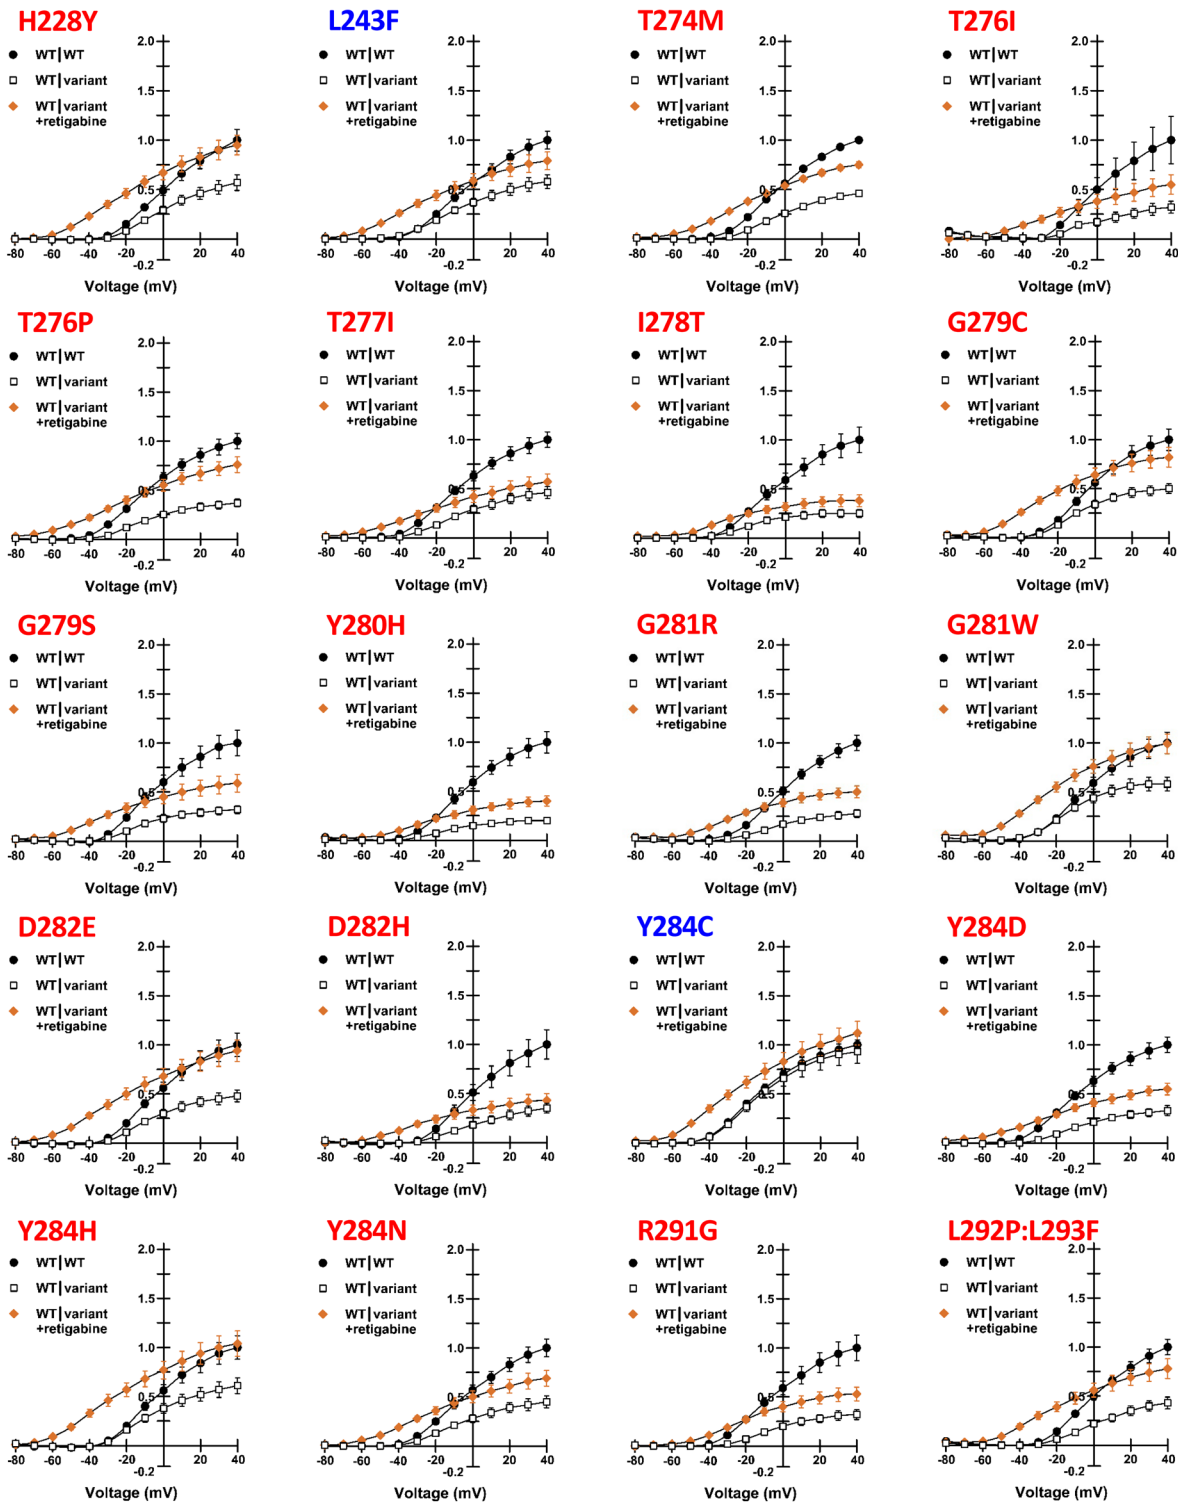

**Figure S11 - continued.** Retigabine effects on whole-cell currents recorded from epilepsy-associated KCNQ2 variants expressed in the heterozygous state. Normalized current-voltage relationships for each variant expressed in the heterozygous state recorded in the absence of retigabine (WT|variant, open squares) compared with heterozygous variants recorded in the absence of retigabine (WT|variant +retigabine, orange filled diamonds). Currents were first normalized to cell capacitance, then re-normalized to the peak current for WT channels recorded in parallel (WT|WT, filled circles). Variant labels: **Blue** = BFNE-associated; **Red** = DEE-associated; **Purple** = BFNE/DEE; **Black** = unknown phenotype category. Complete data sets are presented in Table S7.

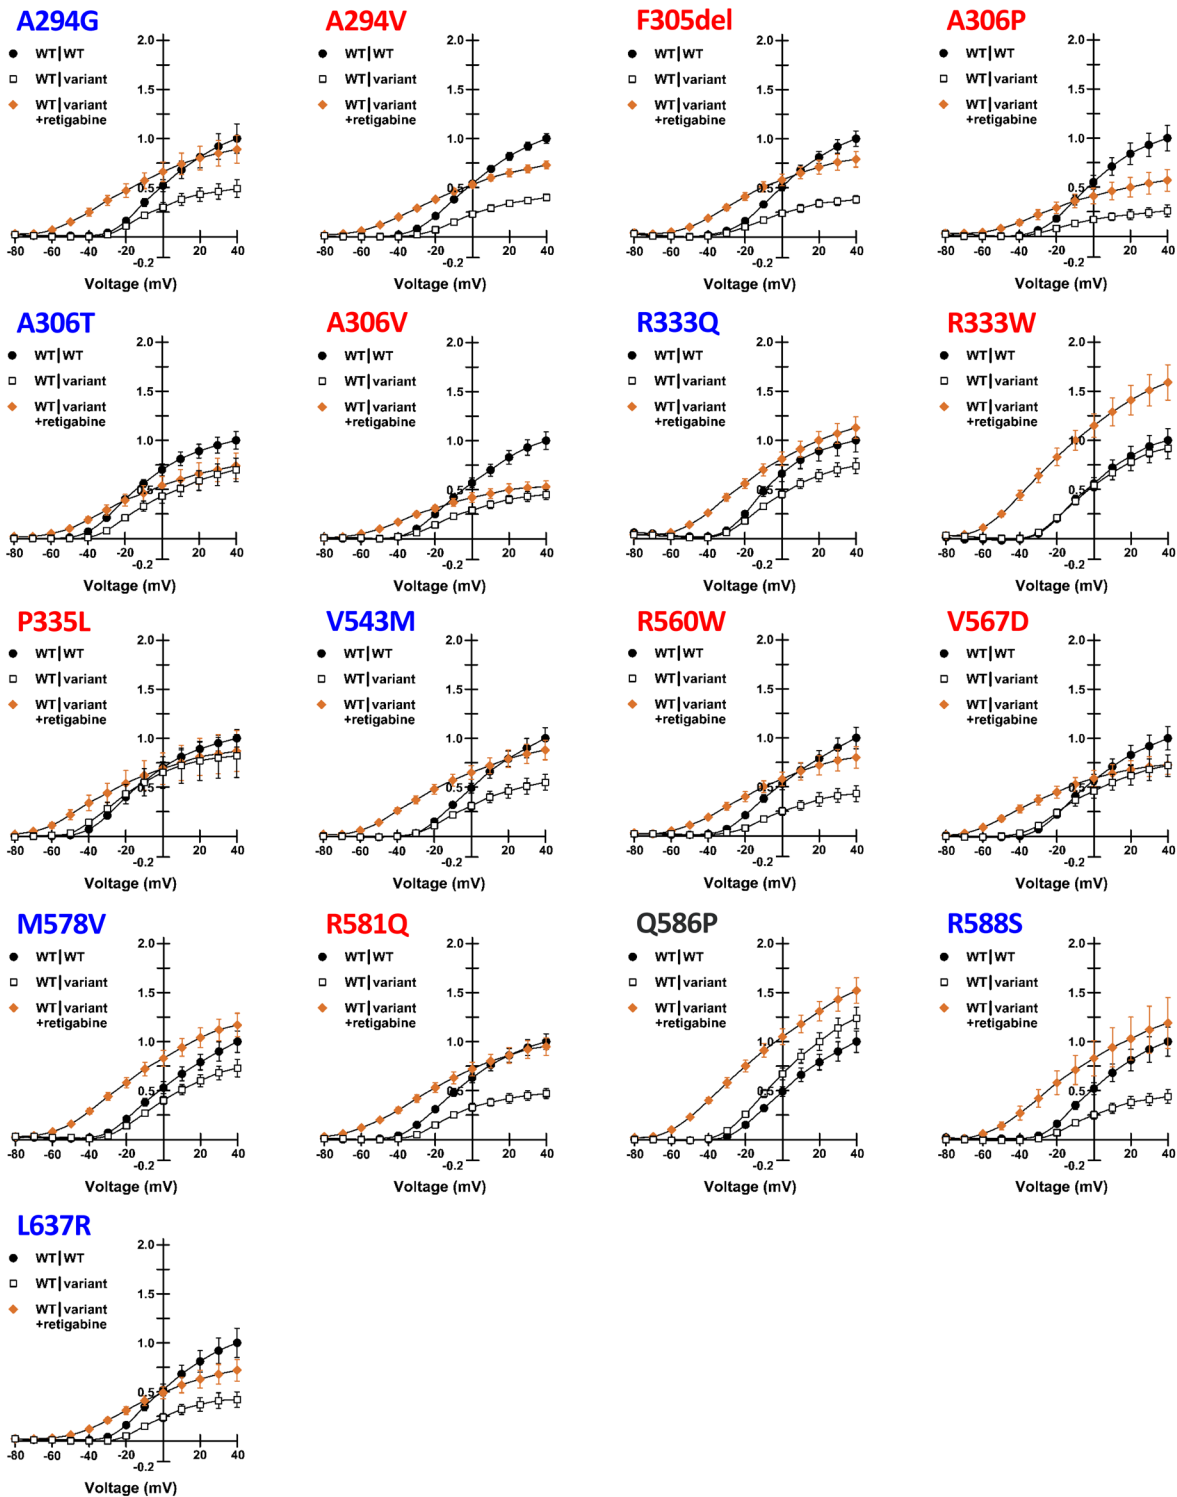

**Figure S11 - continued.** Retigabine effects on whole-cell currents recorded from epilepsy-associated KCNQ2 variants expressed in the heterozygous state. Normalized current-voltage relationships for each variant expressed in the heterozygous state recorded in the absence of retigabine (WT|variant, open squares) compared with heterozygous variants recorded in the absence of retigabine (WT|variant +retigabine, orange filled diamonds). Currents were first normalized to cell capacitance, then re-normalized to the peak current for WT channels recorded in parallel (WT|WT, filled circles). Variant labels: **Blue** = BFNE-associated; **Red** = DEE-associated; **Purple** = BFNE/DEE; **Black** = unknown phenotype category. Complete data sets are presented in **Table S7**.

**Table S1 – KCNQ2 variant information**

| Nucleotide        | Amino Acid            | Channel Domain  | Phenotype | MAF (gnomAD) | ClinVar                      | PubMed ID          |
|-------------------|-----------------------|-----------------|-----------|--------------|------------------------------|--------------------|
| c.128C>T          | p.Ala43Val            | N-term          | PV        | 0.000176     | <a href="#">LB/VUS</a>       |                    |
| c.242T>C          | p.Leu81Pro            | N-term          | BFNE      | 0            | N/A                          | 29215089           |
| c.312C>G          | p.Phe104Leu           | TMD: S1         | PV        | 0.000008     | N/A                          |                    |
| c.338C>T          | p.Ser113Phe           | TMD: S1-S2-Link | DEE       | 0            | <a href="#">VUS/LP</a>       | 29655203           |
| c.343A>C          | p.Ile115Leu           | TMD: S1-S2-Link | PV        | 0.000016     | N/A                          |                    |
| c.388G>A          | p.Glu130Lys           | TMD: S2         | DEE       | 0            | <a href="#">PATH</a>         | 27535030           |
| c.431G>A          | p.Arg144Gln           | TMD: S2-S3-Link | DEE       | 0            | <a href="#">PATH/LP</a>      | 23934111           |
| c.430C>T          | p.Arg144Trp           | TMD: S2-S3-Link | DEE       | 0            | <a href="#">PATH/LP</a>      | 28628100; 28867141 |
| c.578C>A          | p.Ala193Asp           | TMD: S2-S3-Link | DEE       | 0            | <a href="#">PATH</a>         | 27602407           |
| c.587C>T          | p.Ala196Val           | TMD: S4         | DEE       | 0            | <a href="#">PATH</a>         | 17475800           |
| c.593G>A          | p.Arg198Gln           | TMD: S4         | DEE       | 0            | <a href="#">PATH</a>         | 27861786           |
| c.601C>T          | p.Arg201Cys           | TMD: S4         | DEE       | 0            | <a href="#">PATH/VUS</a>     | 24107868           |
| c.602G>A          | p.Arg201His           | TMD: S4         | DEE       | 0            | <a href="#">PATH</a>         | 23708187           |
| c.608T>C          | p.Leu203Pro           | TMD: S4         | DEE       | 0            | <a href="#">PATH</a>         | 26007637           |
| c.612G>T          | p.Gln204His           | TMD: S4         | BFNE      | 0            | <a href="#">LP</a>           | 27602407           |
| c.620G>A          | p.Arg207Gln           | TMD: S4         | DEE       | 0            | <a href="#">PATH/LP</a>      | 17872363           |
| c.619C>T          | p.Arg207Trp           | TMD: S4         | BFNE      | 0            | <a href="#">PATH</a>         | 11572947           |
| c.629G>A          | p.Arg210His           | TMD: S4         | DEE       | 0            | <a href="#">PATH</a>         | 24107868           |
| c.635A>G          | p.Asp212Gly           | TMD: S4         | BFNE      | 0            | N/A                          | 19344764           |
| c.634G>T          | p.Asp212Tyr           | TMD: S4         | DEE       | 0            | <a href="#">PATH</a>         | 28817111           |
| c.640C>T          | p.Arg214Trp           | TMD: S4         | BFNE      | 0            | <a href="#">PATH/LP</a>      | 11175290; 29056246 |
| c.684C>A          | p.His228Gln           | TMD: S4-S5-Link | BFNE      | 0            | <a href="#">VUS</a>          | 14534157           |
| c.683A>G          | p.His228Arg           | TMD: S4-S5-Link | DEE       | 0            | <a href="#">LP</a>           |                    |
| c.682C>T          | p.His228Tyr           | TMD: S4-S5-Link | BFNE      | 0            | <a href="#">Not Provided</a> | 28837158           |
| c.712A>G          | p.Ile238Val           | TMD: S5         | PV        | 0.000008     | <a href="#">VUS</a>          |                    |
| c.727C>T          | p.Leu243Phe           | TMD: S5         | BFNE      | 0            | <a href="#">PATH</a>         | 14534157           |
| c.821C>T          | p.Thr274Met           | TMD: P-loop     | DEE       | 0            | <a href="#">PATH</a>         | 22275249           |
| c.827C>T          | p.Thr276Ile           | TMD: P-loop     | DEE       | 0            | <a href="#">PATH</a>         | 24463883           |
| c.826A>C          | p.Thr276Pro           | TMD: P-loop     | DEE       | 0            | N/A                          | 29720203           |
| c.830C>T          | p.Thr277Ile           | TMD: P-loop     | DEE       | 0            | N/A                          | 26544041           |
| c.833T>C          | p.Ile278Thr           | TMD: P-loop     | DEE       | 0            | <a href="#">LP</a>           | 30109124           |
| c.832A>G          | p.Ile278Val           | TMD: P-loop     | PV        | 0.000008     | N/A                          |                    |
| c.835G>T          | p.Gly279Cys           | TMD: P-loop     | DEE       | 0            | <a href="#">PATH</a>         | 25959266           |
| c.836G>A          | p.Gly279Ser           | TMD: P-loop     | DEE       | 0            | N/A                          | 27734276           |
| c.838T>C          | p.Tyr280His           | TMD: P-loop     | DEE       | 0            | <a href="#">PATH</a>         | 27779742           |
| c.841G>A          | p.Gly281Arg           | TMD: P-loop     | DEE       | 0            | <a href="#">LP</a>           | 24107868           |
| c.841G>T          | p.Gly281Trp           | TMD: P-loop     | DEE       | 0            | <a href="#">PATH</a>         | 25880994           |
| c.846C>A          | p.Asp282Glu           | TMD: P-loop     | DEE       | 0            | N/A                          | 28133863           |
| c.844G>C          | p.Asp282His           | TMD: P-loop     | DEE       | 0            | <a href="#">VUS/LP</a>       | 29655203           |
| c.851A>G          | p.Tyr284Cys           | TMD: P-loop     | BFNE      | 0            | <a href="#">PATH</a>         | 9425895            |
| c.850T>G          | p.Tyr284Asp           | TMD: P-loop     | DEE       | 0            | <a href="#">PATH</a>         | 27535030           |
| c.850T>C          | p.Tyr284His           | TMD: P-loop     | DEE       | 0            | N/A                          | 29588952           |
| c.850T>A          | p.Tyr284Asn           | TMD: P-loop     | DEE       | 0            | N/A                          |                    |
| c.871A>G          | p.Arg291Gly           | TMD: P-loop     | DEE       | 0            | N/A                          | 27779742           |
| c.[875T>C:877C>T] | p.Leu292Pro:Leu293Phe | TMD: S6         | DEE       | 0            | <a href="#">LP, VUS</a>      |                    |

**Table S1 – (continued) KCNQ2 variant information**

| Nucleotide        | Amino Acid  | Channel Domain | Phenotype | MAF (gnomAD) | ClinVar                  | PubMed ID                    |
|-------------------|-------------|----------------|-----------|--------------|--------------------------|------------------------------|
| c.881C>G          | p.Ala294Gly | TMD: S6        | BFNE      | 0            | <a href="#">PATH</a>     | 17129708                     |
| c.881C>T          | p.Ala294Val | TMD: S6        | DEE       | 0            | <a href="#">PATH</a>     | 17129708                     |
| c.913_915delTTC   | p.Phe305del | TMD: S6        | DEE       | 0            | N/A                      | 28554332; 28728838; 18640800 |
| c.916G>C          | p.Ala306Pro | TMD: S6        | DEE       | 0            | <a href="#">PATH</a>     | 29655203                     |
| c.916G>A          | p.Ala306Thr | TMD: S6        | DEE       | 0            | <a href="#">PATH</a>     | 9425895; 26138355            |
| c.917C>T          | p.Ala306Val | TMD: S6        | DEE       | 0            | <a href="#">PATH</a>     | 31152295                     |
| c.998G>A          | p.Arg333Gln | C-term         | BFNE      | 0.000004     | <a href="#">PATH/LP</a>  | 29215089; 14534157           |
| c.997C>T          | p.Arg333Trp | C-term         | DEE       | 0            | <a href="#">PATH</a>     | 16039833                     |
| c.1004C>T         | p.Pro335Leu | C-term         | DEE       | 0            | <a href="#">PATH/LP</a>  | 28867141                     |
| c.1123C>G         | p.Gln375Glu | C-term         | DEE       | 0.000018     | N/A                      |                              |
| c.1229C>T         | p.Pro410Leu | C-term         | PV        | 0.000043     | <a href="#">VUS</a>      |                              |
| c.1505C>T         | p.Ala502Val | C-term         | PV        | 0.000036     | <a href="#">VUS</a>      |                              |
| c.1545G>C         | p.Glu515Asp | C-term         | PV        | 0.002517     | <a href="#">B/LB/VUS</a> | 19380078                     |
| c.1627G>A         | p.Val543Met | C-term         | BFNE      | 0.000004     | <a href="#">VUS/LP</a>   | 28399683                     |
| c.1678C>T         | p.Arg560Trp | C-term         | DEE       | 0            | <a href="#">PATH/LP</a>  | 22275249                     |
| c.1700T>A         | p.Val567Asp | C-term         | DEE       | 0            | <a href="#">LP</a>       | 27888506                     |
| c.1732A>G         | p.Met578Val | C-term         | BFNE      | 0            | <a href="#">PATH/LP</a>  | 25982755                     |
| c.1742G>A         | p.Arg581Gln | C-term         | DEE       | 0            | <a href="#">PATH/LP</a>  | 27864847                     |
| c.1757A>C         | p.Gln586Pro | C-term         | DEE       | 0            | <a href="#">VUS</a>      |                              |
| c.1764A>T         | p.Arg588Ser | C-term         | BFNE      | 0            | <a href="#">PATH</a>     | 25982755                     |
| c.1810C>T         | p.Arg604Cys | C-term         | PV        | 0.000008     | <a href="#">VUS</a>      |                              |
| c.1814C>G         | p.Thr605Ser | C-term         | PV        | 0.000056     | <a href="#">VUS/LB</a>   |                              |
| c.1910T>G         | p.Leu637Arg | C-term         | BFNE      | 0            | <a href="#">PATH</a>     | 25982755                     |
| c.1988A>G         | p.Glu663Gly | C-term         | PV        | 0.000047     | N/A                      |                              |
| c.2101_2103delTCT | p.Phe701del | C-term         | PV        | 0.000009     | N/A                      |                              |
| c.2209G>A         | p.Gly737Ser | C-term         | PV        | 0.000016     | <a href="#">VUS</a>      |                              |
| c.2252C>T         | p.Ser751Leu | C-term         | PV        | 0.000065     | <a href="#">VUS</a>      |                              |
| c.2264A>G         | p.Tyr755Cys | C-term         | PV        | 0.002953     | <a href="#">B/LB</a>     |                              |
| c.2266G>A         | p.Gly756Ser | C-term         | PV        | 0.000264     | <a href="#">LB</a>       |                              |
| c.2279G>A         | p.Arg760His | C-term         | PV        | 0.000059     | <a href="#">VUS</a>      |                              |
| c.2312C>T         | p.Thr771Ile | C-term         | PV        | 0.000047     | <a href="#">VUS</a>      |                              |
| c.2339A>C         | p.Asn780Thr | C-term         | PV        | 0.609194     | <a href="#">B</a>        |                              |
| c.2377G>C         | p.Val793Leu | C-term         | PV        | 0.000025     | <a href="#">VUS</a>      |                              |
| c.2560C>T         | p.Arg854Cys | C-term         | PV        | 0.000226     | <a href="#">B/LB</a>     |                              |
| c.2570C>T         | p.Thr857Ile | C-term         | PV        | 0.000019     | N/A                      |                              |
| c.2572G>A         | p.Gly858Ser | C-term         | PV        | 0.000030     | <a href="#">VUS</a>      |                              |



**Table S2. Sequence of mutagenic primers used to generate KCNQ2 variants.**

| Nucleotide change | Amino acid change | Forward Primer                       | Reverse Primer                     |
|-------------------|-------------------|--------------------------------------|------------------------------------|
| c.128C>T          | p.Ala43Val        | GCTGATCGTCGGCTCCGAGCCCCCAAG          | CGGAGCCGACGATCAGCAGCGCCCCGTCC      |
| c.242T>C          | p.Leu81Pro        | GCAGAATTTCCCTACAACGTGCTGGAGCGGCC     | TGTAGGGGAAATTCCTGAGCTTCGGGTAGAAGG  |
| c.312C>G          | p.Phe104Leu       | CTGGTTTTGCTCTGCCTCGTGTCTGTGTTTTT     | AGGCAGGACAAAACCAGGAGAACCGTAGGCGTG  |
| c.338C>T          | p.Ser113Phe       | GTGTTTTTCACCATCAAGGAGTATGAGAAGAGCTCG | TTGATGGTGA AAAACACAGACAGCAGGCGAGG  |
| c.343A>C          | p.Ile115Leu       | TTCCACCCTCAAGGAGTATGAGAAGAGCTCGGAGG  | ACTCCTTGAGGGTGGAAAAACAGACAGCAGGAGG |
| c.388G>A          | p.Glu130Lys       | CCTGA AAAATCGTGACTATCGTGGTGTGGCGTG   | TAGTCACGATTTTCAGGATGTAGAGGGCCCCCTC |
| c.430C>T          | p.Arg144Trp       | GTACTTCGTGTGGATCTGGGCCGAGGCTGC       | AGATCCACACGAACTCCACGCCAAACACC      |
| c.431G>A          | p.Arg144Gln       | TACTTCGTGCAGATCTGGGCCGAGGCTGCTG      | CAGATCTGCACGAACTCCACGCCAAACAC      |
| c.578C>A          | p.Ala193Asp       | CGTCTTTGACACATCTGCGCTCCGGAGCCT       | CAGATGTGTCAAAGACGTTGCCCTGGGAGCC    |
| c.587C>T          | p.Ala196Val       | GCCACATCTGTGCTCCGAGCCTGCGCTTCC       | CGGAGCACAGATGTGGCAAAGACGTTGCCCTG   |
| c.593G>A          | p.Arg198Gln       | TCTGCGCTCCAGAGCCTGCGCTTCTGCAGAT      | CGCAGGCTCTGGAGCGCAGATGTGGCAAAGAC   |
| c.601C>T          | p.Arg201Cys       | GCCTGTGCTTCTGCAGATTCTGCGGATGATC      | CTGCAGGAAGCACAGGCTCCGGAGCGCAGATGT  |
| c.602G>A          | p.Arg201His       | CCTGCACTTCTGCAGATTCTGCGGATGATCC      | TCTGCAGGAAGTGCAGGCTCCGGAGCGCAGATGT |
| c.608T>C          | p.Leu203Pro       | CTTCCCGCAGATTCTGCGGATGATCCGCATG      | GCAGAATCTCGGGAAGCGCAGGCTCCGGAGC    |
| c.612G>T          | p.Gln204His       | CCTGCATATTCTGCGGATGATCCGCATGGACC     | TCCGCAGAATATGCAGGAAGCGCAGGCTCCGG   |
| c.620G>A          | p.Arg207Gln       | AGATTTCTGCAGATGATCCGCATGGACCGCGG     | GATCATCTGCAGAATCTGCAGGAAGCGCAGG    |
| c.619C>T          | p.Arg207Trp       | CAGATTCTGTGGATGATCCGCATGGACCGGC      | ATCATCCACAGAATCTGCAGGAAGCGCAGG     |
| c.629G>A          | p.Arg210His       | GCCGATGATCCACATGGACCGCGGGGAGGC       | CCATGTGGATCATCCCGAGAATCTGCAGGAAG   |
| c.635A>G          | p.Asp212Gly       | GATCCGCATGGCGCCGGCGGGAGGCACCTG       | GCCCGCCATCGGATCATCCCGAGAATCTGC     |
| c.634G>T          | p.Asp212Tyr       | TGATCCGCATGTACCGCGGGGAGGCACCTG       | CCGGTACATCGGATCATCCCGAGAATCTGC     |
| c.640C>T          | p.Arg214Trp       | TGGACCGGTGGGGAGGCACCTGGAAGCTGC       | GCCTCCCAACCGGTCCATCGGATCATCCG      |
| c.684C>A          | p.His228Gln       | TATGCCCAAGCAAGGAGCTGGTCACTGCCTG      | TCCTTGCTTGGGCATAGACCACAGAGCCAG     |
| c.683A>G          | p.His228Arg       | CTATGCCCGCAGCAAGGAGCTGGTCACTGCC      | CCTTGCTGCGGCATAGACCACAGAGCCAG      |
| c.682C>T          | p.His228Tyr       | CTATGCCACAGCAAGGAGCTGGTCACTGCC       | CCTTGCTGTAGGCATAGACCACAGAGCCAGC    |
| c.712A>G          | p.Ile238Val       | TGGTACGCTGGCTTCTTTGTCTCATCTGCG       | AGGAAGCCGACGTACCAGGCAGTGACCAGCTCC  |
| c.727C>T          | p.Leu243Phe       | TTCTTTGTTCATCTGGCCTCGTTCTGCTGGTG     | AGGATGAAACAAAGGAAGCCGATGTACCAGGCAG |
| c.821C>T          | p.Thr274Met       | GGTGGGCTGATCATGCTGACCAACA            | TGGTGGTCAGCATGATCAGGCCCAACC        |
| c.827C>T          | p.Thr276Ile       | CGCTGATCACCATTGGCTACGGGGACAAGTAC     | GCCAATGGTGTATCAGCGTGATCAGGCCCAACC  |
| c.826A>C          | p.Thr276Pro       | CACGCTGCCACCATTGGCTACGGGGACAAG       | CAATGGTGGGACGCGTGATCAGGCCCAACA     |
| c.830C>T          | p.Thr277Ile       | TGACCACTATTGGCTACGGGGACAAGTACCC      | GTAGCCAATGTATGGTCAGCGTGATCAGGCC    |
| c.833T>C          | p.Ile278Thr       | GACCACCACTGGCTACGGGGACAAGTACCCC      | CGTAGCCAATGGTGGTCAGCGTGATCAGGCC    |
| c.832A>G          | p.Ile278Val       | GACCACCACTGGCTACGGGGACAAGTACCCC      | CGTAGCCAATGGTGGTCAGCGTGATCAGGCC    |
| c.835G>T          | p.Gly279Cys       | ACCACCATTGCTACGGGGACAAGTACCCC        | CCGTAGCAATGGTGGTCAGCGTGATCAGGCC    |
| c.836G>A          | p.Gly279Ser       | ACCACCATTGCTACGGGGACAAGTACCCC        | CCGTAGCAATGGTGGTCAGCGTGATCAGGCC    |
| c.838T>C          | p.Tyr280His       | ACCATTGGCCACGGGGACAAGTACCCCAGAC      | TCCCCGTGGCAATGGTGGTCAGCGTGATCAG    |
| c.841G>A          | p.Gly281Arg       | ATTGGCTACAGGGACAAGTACCCCAGACCTG      | TTGTCCCTGTAGCAATGGTGGTCAGCGTGATC   |
| c.841G>T          | p.Gly281Trp       | ATTGGCTACAGGGACAAGTACCCCAGACCTG      | TTGTCCCTGTAGCAATGGTGGTCAGCGTGATC   |
| c.846C>A          | p.Asp282Glu       | TACGGGGA AAGTACCCCAGACTGGAACGG       | GGGTACTTTCCCGTAGCCAATGGTGGTCAG     |
| c.844G>C          | p.Asp282His       | CTACGGGCAACAAGTACCCCAGACTGGAACG      | GGTACTTTGCCCCGTAGCCAATGGTGGTCAGC   |
| c.851A>G          | p.Tyr284Cys       | GGGACAAGTCCCCAGACTGGAACGGCAG         | CTGGGGCACTTTGCCCGTAGCCAATGGTGG     |
| c.850T>G          | p.Tyr284Asp       | GGGACAAGGACCCCAGACTGGAACGGCA         | TGGGGGTCTTGTCCCCGTAGCCAATGGTGG     |
| c.850T>C          | p.Tyr284His       | GGGACAAGCACCCCAGACTGGAACGGCA         | TGGGGGTCTTGTCCCCGTAGCCAATGGTGG     |

**Table S2 - continued. Sequence of mutagenic primers used to generate KCNQ2 variants.**

| Nucleotide change | Amino acid change     | Forward Primer                               | Reverse Primer                                      |
|-------------------|-----------------------|----------------------------------------------|-----------------------------------------------------|
| c.850T>A          | p.Tyr284Asn           | GGGGACAAG <u>A</u> ACCCCCAGACCTGGAACGGCA     | TGGGGG <u>T</u> CTTGTCCCGTAGCCAATGGTGG              |
| c.871A>G          | p.Arg291Gly           | ACCTGGAACGG <u>G</u> GGCTCCTTGCGG            | CCGCAAGGAGCC <u>G</u> CCGTTCCAGGT                   |
| c.[875T>C:877C>T] | p.Leu292Pro:Leu293Phe | CAGGC <u>C</u> TTTGGCGGAACCTTCACCCATCG       | TTGCCGCAAA <u>A</u> GGGCTGCCGTTCCAGGTCTGGG          |
| c.881C>T          | p.Ala294Val           | CTCCTTG <u>T</u> GGCAACCTTCACCTCATCGGTG      | AAGGTTGCC <u>A</u> CAAGGAGCCTGCCGTTCCAGG            |
| c.881C>G          | p.Ala294Gly           | CTCCTTG <u>G</u> GGCAACCTTCACCTCATCGGTG      | AAGGTTGCC <u>C</u> CAAGGAGCCTGCCGTTCCAGG            |
| c.913_915delITC   | p.Phe305del           | TGTCTCCTTC...GCGCTGCTGCAGGCATCTTG            | CAGCGC...GAAGGAGACACCGATGAGGGTGAAG                  |
| c.916G>C          | p.Ala306Pro           | CTCCTTCTTC <u>C</u> CGTGCCTGCAGGCATCTTGG     | GCAGCG <u>G</u> AAGAAGGAGACACCGATGAGGGTG            |
| c.916G>A          | p.Ala306Thr           | CTCCTTCTTC <u>A</u> CGTGCCTGCAGGCATCTTGG     | GCAGCG <u>T</u> AAGAAGGAGACACCGATGAGGGTG            |
| c.917C>T          | p.Ala306Val           | CCCTTCTCG <u>T</u> GCTGCCTGCAGGCATCTTGGG     | AGGCAGC <u>A</u> CGAAGAAGGAGACACCGATGAGGG           |
| c.998G>A          | p.Arg333Gln           | GAGAAGAGG <u>C</u> AAGACCCGGCAGCAGGCCTGAT    | GGGTT <u>C</u> IGCTCTTCTCAAAGTGCTTCTGCCTG           |
| c.997C>T          | p.Arg333Trp           | TTGAGAAGAGG <u>T</u> GGAACCCGGCAGCAGGCCTG    | GTTCC <u>A</u> CTCTTCTCAAAGTGCTTCTGCCTGTG           |
| c.1004C>T         | p.Pro335Leu           | AGGCGGAACCT <u>G</u> GGCAGCAGGCCTGATCCAGTC   | GCTGCC <u>A</u> GGTTCCGCCTTCTCAAAGTGCTTC            |
| c.1123C>G         | p.Gln375Glu           | TACAGTT <u>C</u> GAAACTCAAACCTACGGGCTCTCC    | GTTTGAGTTT <u>C</u> GAACTGTACATGGGCAGGGTG           |
| c.1229C>T         | p.Pro410Leu           | AGGACCCCT <u>G</u> CCGCGAGCCGTCTCCAAGCC      | CTCCGGC <u>G</u> GGGGGCTCCTTCTCAAAGCGGAG            |
| c.1505C>T         | p.Ala502Val           | GTGCCG <u>T</u> GACGGCAGAAGCAAGCAAGC         | CTGCCG <u>T</u> GAC <u>C</u> GGCACCCCTTGATGCGGAAAGC |
| c.1545G>C         | p.Glu515Asp           | CGGAGAC <u>G</u> ACATTGTGGATGACAAGAGCTGCC    | CCACAATG <u>C</u> TCTCCGGGAGGCTTCTCTTCTG            |
| c.1627G>A         | p.Val543Met           | CAGAGC <u>C</u> ATGTGTGTCATGCGGTTCTGGTGTG    | TGACACAC <u>A</u> GGCTCTGATGCTGACTTTGAGGGC          |
| c.1678C>T         | p.Arg560Trp           | GGAGAGCCT <u>G</u> GGCCCTACGACGTGATGGACG     | AGGGCC <u>A</u> CAGGCTCTCTTGAACCTCCGCTTG            |
| c.1700T>A         | p.Val567Asp           | ATGACG <u>C</u> ATCGAGCAGTACTCAGCCGGC        | TGCTCGAT <u>G</u> CTGCATCAGTCGTAGGGCC               |
| c.1732A>G         | p.Met578Val           | TGGAC <u>G</u> TGCTGCCGAATTAAAGACCTGCAG      | TCGGGACAGC <u>A</u> GTCAGGTGGCCGGCTGAGTA            |
| c.1742G>A         | p.Arg581Gln           | TCCC <u>A</u> AATTAAGAGCCTCGAGTCCAGAGTGGAC   | AGGCTCTTAAT <u>T</u> TGGGACAGCATGTCCAGGTGGC         |
| c.1757A>C         | p.Gln586Pro           | AGAGCCTG <u>C</u> CTCCAGAGTGACAGATCGTGG      | TCTGGAC <u>G</u> CAGGCTCTTAATTCGGGACAGCATG          |
| c.1764A>T         | p.Arg588Ser           | TGCAGTCCAG <u>T</u> GTGACAGATCGTGGGGCGG      | GTCCAC <u>A</u> CTGGACTGCAGGCTCTTAATTCGGG           |
| c.1810C>T         | p.Arg604Cys           | GGACAAGGACT <u>G</u> CACCAAGGGCCCGCCGAG      | CCTTGGT <u>G</u> CTCTGTCCGTGATCGCTGG                |
| c.1814C>G         | p.Thr605Ser           | AAGGACCGCAG <u>C</u> CAAGGGCCCGCCGAGGC       | CCCTTGT <u>G</u> CGGCTCTTCCGTGATCGC                 |
| c.1910T>G         | p.Leu637Arg           | AGAAGC <u>G</u> GGACTTCTGGTGAATATCTACATGCAGC | CAGGAAGTCC <u>G</u> CTTCTTCCATGGACAAGACCTGC         |
| c.1988A>G         | p.Glu663Gly           | GGGGCCAAAG <u>G</u> GCCGGAGCCGGCCGCGCC       | TCCGGCCTT <u>T</u> GGCCCCAAGTAGGCTCCG               |
| c.2101_2103delITC | p.Phe701del           | CCAGAAGA <u>A</u> C...TCGGCGCCCCGGCCGCG      | CGCCGA...GTTCTTGGCCCGTGAGCTG                        |
| c.2209G>A         | p.Gly737Ser           | GGACCAC <u>A</u> GTCTCCCTGGTGCATCCCG         | CCAGGGAG <u>C</u> TGTGTCCCCACGGGGGAG                |
| c.2252C>T         | p.Ser751L eu          | CGAGCGG <u>T</u> GTGCTGCCCTACGGCGGG          | CGGACAGC <u>A</u> ACCCTCGTGGCGAGGGGG                |
| c.2264A>G         | p.Tyr755Cys           | TGTCCGCT <u>C</u> GGCGGGGGCAACCGCGC          | CCCCCGC <u>A</u> GCGGACAGCGACCGCTCG                 |
| c.2266G>A         | p.Gly756Ser           | TCCGCCTAC <u>A</u> GGCGGGGGCAACCGCGCCA       | CCCCCGC <u>T</u> GTAGGCGGACAGCGACCGCTC              |
| c.2279G>A         | p.Arg760His           | GGCAACC <u>A</u> CGCCAGCATGGAGTTCTGCG        | ATGCTGGC <u>G</u> TGGTTCGCCCGCGGTAGGC               |
| c.2312C>T         | p.Thr771Ile           | CAGGAGGACAT <u>C</u> CCGGGCTGCAGGCCCC        | CCCCGG <u>A</u> TGTCTCTGCGCGAGAACTC                 |
| c.2339A>C         | p.Asn780Thr           | AGGGGAC <u>C</u> CTGCGGGACAGCGACACGTC        | GTCCCGCAGG <u>G</u> TCCCTCGGGGGCCCTGC               |
| c.2377G>C         | p.Val793Leu           | TCCCGTCC <u>T</u> TGGACCACGAGGAGCTGGAGC      | GTGGTCCAG <u>G</u> GACGGGATGGAGATGGACGTG            |
| c.2560C>T         | p.Arg854Cys           | CCCCGCCA <u>T</u> GCTCGGCCACCGCGGAGG         | GGCCGAGC <u>A</u> TGGCGGGGGCCCGCACGG                |
| c.2570C>T         | p.Thr857Ile           | CGGCCA <u>T</u> CGGCGAGGGTCCCTTTGGTGA        | ACCCTCGCC <u>A</u> TGGCCGAGCGTGGCGGG                |
| c.2572G>A         | p.Gly858Ser           | GCCACC <u>A</u> GCGAGGGTCCCTTTGGTGACG        | GGACCTCGC <u>T</u> GTTGGCCGAGCGTGGCGG               |

**Table S3. Manual patch clamp and high throughput functional results.**

See Excel file:

<https://digitalhub.northwestern.edu/files/151bf778-d6be-49a9-b4b7-6f75ba9c0e2e>

**Table S4. Functional properties of CHO-Q3 cells electroporated with homozygous variant KCNQ2 cDNA recorded under control conditions.**

See Excel file:

<https://digitalhub.northwestern.edu/files/5e63c462-56c3-4cf5-9468-f4e2e20af714>

**Table S5. Functional properties of CHO-Q3 cells co-electroporated with heterozygous variant plus wild type KCNQ2 cDNA recorded under control conditions.**

See Excel file:

<https://digitalhub.northwestern.edu/files/33bd2d57-21b4-4d10-aa59-07e1d8551ada>

**Table S6 Functional properties of CHO-Q3 cells electroporated with homozygous variant KCNQ2 cDNA recorded following exposure to retigabine.**

See Excel file:

<https://digitalhub.northwestern.edu/files/ffb6d08c-4af6-41f9-b319-26b593987e01>

**Table S7. Functional properties of CHO-Q3 cells co-electroporated with heterozygous variant plus wild type KCNQ2 cDNA recorded following exposure to retigabine.**

See Excel file:

<https://digitalhub.northwestern.edu/files/b2c17941-0e0e-4255-b0fd-cf34f4628ea6>
